## New Diplomates, American Board of Anesthesiology®, Fall 2014

- Amy Abdallah, M.D.  
 Mohammed Abdel Rahim, M.D.  
 Richard Bradley Abel, M.D.  
 Jacob Abraham, M.D.  
 Michael Adams, M.D.  
 Babatunde Ariyo Adekola, M.D.  
 Oludayo Adedotun Adeyefa, M.D.  
 Melissa J. Aebly, M.D.  
 Tomalika Ahsan-Paik, M.D.  
 Anita Naushir Akbar Ali, M.D.  
 Ozan Akca, M.D.  
 Yara Al Jalbout, M.D.  
 Golnaz Alemzadeh, M.D.  
 Shanaz Ali, M.D.  
 Joseph Alioto, M.D.  
 Carlo Joseph Alphonso, M.D.  
 Sharif Mohamed Hasan Al-Ruzzeh, M.D., Ph.D.  
 Jennifer Narciso Alt, M.D.  
 Peter Amato, M.D.  
 Sunil Anand, M.D.  
 Michael R. Ander, M.D.  
 Matthew Andersen, M.D.  
 Maged Andrews, M.B., B.Ch.  
 Nicole Ansell, M.D.  
 Mogin Antoine, M.D.  
 Anil Kumar Arekapudi, M.B., B.S.  
 Barrington Lindsay Arthurs, M.D.  
 Gadi Arzanipour, D.O.  
 Eric Joseph Ashford, M.D.  
 Mohamed Naguib Ibrahim Attala, M.D.  
 Naola Shaneal Austin, M.D.  
 Taylor Gentry Austin, M.D.  
 William Azzoli, M.D.  
 Mark E. Backeris, D.O.  
 Kevin M. Backfish, M.D.  
 Jessica Ellen Baer, M.D.  
 Matthew Lecarpentier Baker, M.D.  
 Tanner Boyd Baker, M.D.  
 Wendy Banfi, M.D.  
 Susan Michelle Baquero-Young, M.D.  
 Brian Christopher Barrett, M.D.  
 James Barron, M.D.  
 Sara Elizabeth Barwise, M.D.  
 Heidi Suzanna Bazick-Cuschieri, M.D.  
 Arthur Douglas Beacham III, D.O.  
 David Howe Beausang, M.D.  
 Daniel John Bebercia, M.D.  
 Steven Anthony Beckley, M.D.  
 Sidney Bedell, M.D.  
 Christen Flack Behzadi, M.D.  
 Cardin Bell, M.D.  
 Deirdre Anneva Bell, M.D.  
 Christopher Lloyd Berentzen, M.D.  
 Stuart Bertsch, M.D.  
 Amitabh Bhandari, M.D.  
 Priti Singh Bhati, M.B., B.S.
- Upasna Bhuria, M.B., B.S.  
 Shannon Bianchi, M.D.  
 Marissa L. Bisbe, D.O.  
 Jason Blue, M.D.  
 Brandie Marie Blunck, M.D.  
 Michael Leo Boisen, M.D.  
 Nichole Bordegaray, M.D.  
 Andrew Boryan, M.D.  
 Michael Bowling, D.O.  
 Eva Boyd, M.D.  
 Jared Boyd, M.D.  
 Eric Christopher Bradstreet, M.D.  
 Vernon American Horse Brewer, M.D.  
 Kristine Elizabeth West Breyer, M.D.  
 Bryan Stephen Brindeiro, M.D.  
 Rebecca Marie Broeckert, M.D.  
 Michael Patrick Bronson, M.D.  
 Daren Richard Brooks, M.D.  
 Ben Brooksby, M.D.  
 Jeffrey Russell Buesing, M.D.  
 Jeremy Gordon Burke, M.D.  
 Peter Burrage, M.D.  
 Ryan Shepard Busch, M.D.  
 Joshua Camara, D.O.  
 Jabari Capp, M.D.  
 Mark Edmund Caridi-Scheible, M.D.  
 Nicole Marie Carignan, M.D.  
 Scott Carra, M.D.  
 Brendan Carvalho, M.B., Ch.B.  
 Brian D. Cauley, M.D.  
 Talmadge Clifford Caviness, M.D.  
 William Boyd Cederquist, M.D.  
 Rebecca K. Chan, M.D.  
 Kiran Nagenahalli Chandrashekarappa, M.B., B.S.  
 David Robert Chang, M.D.  
 Shasky Kevin Charles, M.D.  
 Premala Chelliah, M.D.  
 Samuel T. Chen, M.D.  
 Tzu-shao Chen, M.D.  
 Wen Chen, M.D.  
 Yue Qiu Chen, M.D.  
 Franklin Roosevelt Cheng, M.D.  
 Shirish R. Chennaiahgari, M.D.  
 Philip David Cheung, M.D.  
 Eric Chiang, M.D.  
 Adam Paul Childers, M.D.  
 Clark K. Choi, M.D.  
 Joon Hwan Choi, M.D.  
 Scott W. Choi, M.D.  
 Young Choi, M.D.  
 Oliver Choo, M.D.  
 Vorapat Chowanadisai, M.D.  
 Omar Chowdhry, D.O.  
 Jason Hyun Chung, M.D.  
 Anthony James Cirone, M.D.  
 Kathryn Watson Cobb, M.D.  
 Elizabeth A. Cohen, M.D.  
 Tolutope Coker, M.D.
- Sean Collins, M.D.  
 Beth A. Conrardy, M.D.  
 Tarah L. Cook, M.D.  
 Ziv Corber, M.D.  
 Milaurise Cortes, M.D.  
 Elizabeth Wilson Crafts, M.D.  
 Ryan Clair Craner, M.D.  
 Christy Johnson Crockett, M.D.  
 Brett H. Cronin, M.D.  
 McNeil Lawrence Cronin, M.D.  
 Samuel R. Crossett, D.O.  
 Justin Robert Cueto, D.O.  
 Kristopher Todd Cunningham, M.D.  
 Sun Daly, M.D.  
 Paul Frederic Dare, M.D.  
 Sean L. DaSilva, M.D.  
 Shirley Datu, D.O.  
 D'Andra Jonique Davis, M.D.  
 Erika Davis, M.D.  
 Kevin August Davis, M.D.  
 Samuel Michael Davis, M.D.  
 Emily Hammond Davoodi, M.D.  
 Aladino De Ranieri, M.D.  
 Marco Ramon del Castillo, M.D.  
 Matthew Delph, M.D.  
 Jeffrey Derham, M.D.  
 Arjun M. Desai, M.D.  
 Amanda Lee Deskins, D.O.  
 Matthew DHaenens, M.D.  
 Neesha Bankim Dhanak, D.O.  
 Nadya M. Dhanani, M.D.  
 Mary DiMiceli, M.D.  
 Ashleigh Dixon, M.D.  
 Catherine Doil, M.D.  
 Nicholas Philip Doiron, M.D.  
 Dimaris Dominguez-Ayala, M.D.  
 Julianne Elizabeth Donnelly, M.D.  
 Morgan K. Dooley, M.D.  
 Janis Dossen Jones, M.D.  
 Adrienne Beth Turner Duffield, M.D.  
 Julie Diane Dunlap, M.D.  
 Amber Lee Dunn, M.D.  
 Kristopher Lee Durbin, M.D.  
 Elizabeth A. Dwyer, M.D.  
 Robert George Eberhardt, M.D.  
 Emmanuel Edson, M.D.  
 Ganiu Abimbola A. Edu, M.D.  
 David Allan Edwards, M.D., Ph.D.  
 Matthew Christopher Edwards, M.D.  
 Juan Egas, M.D.  
 Kenneth Eichenbaum, M.D.  
 Amir O. Elhassan, M.D.  
 Richard Elizee, M.D.  
 Adrian Elliott, M.D.  
 Matthew Patrick Elliott, M.D.  
 Kelly Galina Elterman, M.D.  
 Mark Andrew Erickson, M.D.  
 Ersne Eromo, M.D.  
 Roy K. Esaki, M.D.
- Enrique Diego Escobar, M.D.  
 Chad David Fairchild, M.D.  
 Tammy Lynn Fairchild, M.D.  
 Abimbola Olasimbo Faloye, M.D.  
 Ndal Farah, M.D.  
 Joshua R. Farthing, M.D.  
 May Anne Fernandez, M.D.  
 James Ross Ferre, M.D.  
 Nicholas Alexander Ferreri, M.D.  
 Mark Andrew Fine, M.D.  
 Stephen Gerard Flynn, M.D.  
 Jeffrey T. Follansbee, M.D.  
 Robert Fong, M.D.  
 Daniel Noah Fox, M.D.  
 Gretchen Elizabeth Fox, M.D.  
 Robert Fraumann, M.D.  
 Joel Michael Frederick, M.D.  
 Brenton Eugene Freeman, D.O.  
 Marshall Levon French, M.D.  
 Leon Freudzon, M.D.  
 Matthew Bach Friese, M.D.  
 Jason Fu, M.D.  
 Derek Joseph Fulcher, M.D.  
 Ithiel Fuller, M.D.  
 Jessica L. Galey, M.D.  
 Jodi Justine Galla, M.D.  
 Jacqueline Maria Galvan, M.D.  
 Peter Jonathan Gambino, D.O.  
 Ryan Clark Gardner, D.O.  
 Chandrika R. Garner, M.D.  
 Eugene Garvin, Jr., M.D.  
 Kyle R. Gassner, M.D.  
 Brice Gaudilliere, M.D., Ph.D.  
 Michelle Luz Gerrard, M.D.  
 Mariya Atanassova Geube, M.D.  
 Fernando J. Gil-Franco, M.D.  
 Dena Gill, M.D.  
 George Moore Gilly, Jr., M.D.  
 Brent Alan Gilmore, M.D.  
 Aaron A. Glaeser, M.D.  
 Sheryl Heather Glassman, D.O.  
 Vicko Gluncic, M.D.  
 Jordan Evan Goldhammer, M.D.  
 Ricardo Gomez, Jr., M.D.  
 Caesar Ricardo Gonzales II, M.D.  
 Sandra Natalia Gonzalez-Rodriguez, M.D.  
 Jason Alan Good, M.D.  
 Emily B. Goodwin, M.D.  
 Meredith Rumon Goodwin, M.D.  
 Jon Gozdanovic, M.D.  
 Nathan Dantas Grabher, M.D.  
 Masilo Grant, M.D.  
 Nakish Danielle Grant, M.D.  
 Christy Deloris Butler Gray, M.D., Ph.D.  
 Weili Gray, M.D.  
 Christal Lee Greene, M.D.  
 Christopher Eric Grindle, M.D.  
 Jason Ross Guercio, M.D.  
 Frantz Guignard, M.D.
- Deepak Gupta, M.D.  
 David Frank Gutierrez, M.D.  
 Maria Cristina Gutierrez, M.D.  
 Haley M. Guzzo, M.D.  
 Juan Miguel Haddad, M.D.  
 Tiffany Hadley, M.D.  
 Christopher Jon Hagen, D.O.  
 Bryan Halverson, M.D.  
 Ashley Anne Hambricht, M.D.  
 Engy Hanna, M.D.  
 Shireen Haque, M.D.  
 Elizabeth Ellen Harlan, M.D.  
 James Alexander Harris, D.O.  
 Ryan D. Harris, M.D.  
 Samuel Jack Hartman, M.D.  
 Christopher Hayes, M.D.  
 Matthew William Hayes, M.D.  
 Stephen Heape, M.D.  
 Jessica Lee Heath, M.D.  
 Boris D. Heifets, M.D., Ph.D.  
 Noah Caleb Heilbrun, M.D.  
 Stephen Robert Henderschedt, M.D.  
 Michael Todd Henderson, D.O.  
 Roger Chad Hendricks, M.D.  
 Jeremy Lynn Hensley, M.D.  
 Daniel Herman, M.D.  
 Bradley Jason Hewlett, M.D.  
 James Lee Hill, Jr., M.D.  
 Melissa Beth Hirsu, M.D.  
 Anna Hoard, M.D.  
 Kimble Frank Horak, M.D.  
 Julie Lauren Horowitz, M.D.  
 Mark Adam Horton, M.D.  
 Cecilia Ann Hosam, M.D.  
 Grace Hsu, M.D.  
 Matthew Leigh Hudkins, M.D.  
 Melissa A. Hughes, M.D.  
 Peter Huonker, M.D.  
 Brian Hurlburt, M.D.  
 Andre Hyilton, M.D.  
 Techecia Idowu, M.D.  
 Michael Thomas Ingoglia, M.D.  
 Susan A. Ironstone, M.D.  
 Lisa Irwin, M.D.  
 Lauren Holt Jackson, M.D.  
 Anand Jain, M.D.  
 Sheetu Jain, M.D.  
 Janelle Jambrosic, M.D.  
 Monique James, M.D.  
 Crystal Jean-Louis, M.D.  
 Maria Celina Jensen, M.D.  
 Todd Ellis Jensen, D.O.  
 Greta Susan Jo, M.D.  
 Kyle Eugene Johnson, M.D.  
 Matthew Robert Johnson, M.D.  
 Sharma Emma Joseph, M.D.  
 John Judd, M.D.  
 Onkar Judge, M.D.  
 Edmund Junciewicz, D.O.  
 Sarfaraz Kabeer, M.D.  
 Ahmed Ramez Elsayed Kafaby, M.B., Ch.B.  
 Markus Kaiser, M.D.  
 Jared Kalina, D.O.  
 Daniel Katz, M.D.  
 Claire Kaura, M.D.  
 Michelle Kawasaki, M.D.

## New Diplomates, American Board of Anesthesiology®, Fall 2014 (continued)

|                             |                             |                              |                              |                              |
|-----------------------------|-----------------------------|------------------------------|------------------------------|------------------------------|
| Mira Kehar, M.D.            | Justin S. Malenkos, M.D.    | Sherry Nashed, M.D.          | Lesley Wojcik Raphael, M.D.  | Edward Daniel Schiller, M.D. |
| Derek H. Keller, M.D.       | Thomas Maliakal, M.B., B.S. | Tavares D. Nero, M.D.        | Karim B. Rashid, M.D.        | Jeanie Schlafly, D.O.        |
| Stanislav Kelner, M.D.      | Naila Raiz                  | Jessica Ng, M.D.             | Michael Richard              | Caleb Robert Schultz, M.D.   |
| Paul Kelsey, M.D.           | Mammadova, M.D.             | Fallon H. Ngo, D.O.          | Rasmussen, M.D.              | Anthony L. Schwagerl, M.D.   |
| Kimberly L. Kesner, M.D.    | Aaron J. Mancuso, M.D.      | Thuy Ngo, M.D.               | Lindsey R. Rath, M.D.        | Andrew D. Schwartz, M.D.     |
| Mohammed Yusuf              | Megan Nicole                | Albert Phan Nguyen, M.D.     | Stephanie A. Rayos, M.D.     | Andrei Sdrulla, M.D., Ph.D.  |
| Khan, M.D.                  | Manento, M.D.               | Ethan Quan Nguyen, M.D.      | Ori Raz, M.D.                | Sudipta Sen, M.B., B.S.      |
| Zareena Khan, M.D.          | Nicholas Bradford           | Rudolph Nguyen, M.D.         | Kimberlee Reetz, M.D.        | Sudarshan Setty, M.B., B.S.  |
| Zeshan Malik Khan, D.O.     | Marcanthony, M.D.           | Thong Hoang Nguyen, M.D.     | Eric Harold Regula, M.D.     | Sunny Niranjan Shah, M.D.    |
| Matthew James               | Simon Mardakh, M.D.         | Angela Nichols, M.D.         | Airiauna Reid, D.O.          | Tristan Shankara, M.D.       |
| Kidwell, M.D.               | Nathan Marengi, M.D.        | Erik Allan Nielson, M.D.     | Catherine S. Reid, M.D.      | Sharad Nilakantan            |
| Lori Kiefer, M.D.           | Rajani Maret, M.D.          | Matthew R. Novak, M.D.       | Joao Pedro Alexandre         | Sharma, M.D.                 |
| Alan Hongjin Kim, M.D.      | Jennifer S. Markus, M.D.    | Soumya Nyshadham, M.D.       | Reinhard, M.D.               | Christopher Dewey            |
| Michael Jinwoo Kim, M.D.    | Michael A. Marques,         | Chiebonam C.                 | Christopher John             | Sharp, M.D.                  |
| Andrew Ryan King, M.D.      | M.D., Ph.D.                 | Oguejiofor, M.D.             | Renaud, D.O.                 | Wendy J. Sharp, M.D.         |
| Samuel Jerome               | Erin Irene Martin, M.D.     | Alamezie T. Ojiaku, M.D.     | James Marshall               | Megan Joan Sharpe, M.D.      |
| King II, M.D.               | Jeffrey Martin, M.D.        | Megan J. Olejniczak, M.D.    | Reusch, M.D.                 | Wei Shen, M.D.               |
| Rebecca Johnson             | Jordan Martin, M.D.         | Oscar Olivera, M.D., Ph.D.   | Kathleen Lopez Reyes, M.D.   | John Adam Shepler, M.D.      |
| Kinnard, M.D.               | Yolanda Marzan, M.D.        | Kikelomo Olorunrinu, M.D.    | Claire Rezba, M.D.           | Andrew Joseph                |
| Aaron Russell Kinney, M.D.  | Daniel Mason, M.D.          | Andrea J. M. Olson, M.D.     | David M. Rhee, M.D.          | Sherman, M.D.                |
| David Scott Kirby, M.D.     | Eric Michael Massey, M.D.   | Iroso Onamade, M.D.          | Jennifer Margaret            | Sonia Renee Shishido, D.O.   |
| Yuka Kiyota, M.D.           | Jennifer Maziad, M.D.       | Lawrence Ong, M.D.           | Rhee, M.D.                   | Patrick Park-Chuen           |
| Justin Lee Klanke, M.D.     | Danielle McCall, M.D.       | Amy Jo Opilla, M.D.          | Stuart Rice, M.D.            | Shum, M.D.                   |
| Gregory Kogan, D.O.         | Kiesha Ann                  | Nicholas John Ordyna, M.D.   | William Clarence             | Alexander Wei Shune, M.D.    |
| Jessica Marie Kramer, D.O.  | McCausland, M.D.            | Jeffrey Ostrander, M.D.      | Richards, M.D.               | Benjamin Sckler, M.D.        |
| Sabine Kreilinger, M.D.     | Jason Douglas               | Garrett Tyler Owen, M.D.     | Lewis Thomas Rieley, M.D.    | Gursimar Kaur Sidhu, M.D.    |
| Caleb Kroll, M.D.           | McCrillis, M.D.             | Meredith Mattison            | Rania Rifaey, M.D.           | Robby Singh Sikka, M.D.      |
| Lakshmi Narasimhulu         | Hamilton Montgomery         | Pace, M.D.                   | Bobbie Lynn Riley, M.D.      | Eric Silverman, M.D.         |
| Kurnutala, M.B., B.S.       | McGee, M.D.                 | Kristoffer Guy Padjen, M.D.  | Marsha Elizabeth Ritter      | Dmitry Sinavsky, M.D.        |
| Leng Thai Ky, M.D.          | Stephen M. McHugh, M.D.     | Christy M. Paiva, M.D.       | Jones, M.D.                  | Maninder Singh, M.D.         |
| Leena Kulkarni Lake, M.D.   | Ethan Mckenzie, M.D.        | Alisha Frank Palliser, M.D.  | Peter David Rivera, M.D.     | Daniel Ryan Skelly, M.D.     |
| Arthur K. Lammers III, D.O. | Dana Lynn McNorton          | Louisa Jayne Palmer,         | Michael William              | Nathanael Ashok Slater, D.O. |
| Brian Edward                | Hall, D.O.                  | M.B., B.S.                   | Roberts, M.D.                | Benjamin Edward              |
| Landreth, D.O.              | Scott Harmon                | Jonathan Z. Pan, M.B.        | Kenneth A.                   | Smith, D.O.                  |
| Jennifer Elizabeth          | McQuilkin, D.O.             | Pirawan Pan, M.D.            | Robinson II, M.D.            | Colin Timothy Smith, M.D.    |
| Lanter, D.O.                | Marisa Christian            | Hess Amir Panjeton, M.D.     | Kristen Rock, M.D.           | Jacob William Smith, M.D.    |
| Malikah Latmore, M.D.       | McSwain, M.D.               | Kellie Adrienne Park, M.D.   | Emmanuel Rodriguez, M.D.     | Jennifer Smith, M.D.         |
| Melinda M. Lawrence, M.D.   | Jaideep Hemu Mehta, M.D.    | Tomasina Q.                  | Brooks H. Rohlen, M.D.       | Sylvia Smith, M.D.           |
| James Clifford Layton, M.D. | Brenton M. Meier, M.D.      | Parker-Actlis, M.D.          | Jason Thomas Rolfe, M.D.     | Victoria Eileen Smith, M.D.  |
| Daniel A. Leach, M.D.       | Mark A. Meyer, M.D.         | Ilona Edyta Parks, D.O.      | Steven K. F. Ropers, M.D.    | Alissa Sodickson, M.D.       |
| Janice Leahy, M.D.          | Megan Miceli, M.D.          | Lauren E.                    | Sondra Marie                 | Dajun Song, M.D.             |
| Helen Heeyoung Lee, M.D.    | David Peter Miller, D.O.    | Parnell-Cassidy, M.D.        | Rosander, M.D.               | Parviz Somoekh, M.D.         |
| Lisa Kit-Ying Lee, M.D.     | Shamail Miller, M.D.        | Ankit Patel, M.D.            | Jasper Mari Rosario, D.O.    | Joel R. Spence, M.D.         |
| Phoebe Hyun Lee, M.D.       | Peter Raymond Moll, M.D.    | Naitik J. Patel, M.D.        | Gabriel J. Rosario           | Jennifer R. Spitler, D.O.    |
| Sarah Angeline Lee, M.D.    | Ebonique B. Moment, M.D.    | Rajeshvari Mahesh            | Perez, M.D.                  | Yelena Spitzer, M.D.         |
| Kelly M. Leinberger, M.D.   | Andrew Jame                 | Patel, M.D.                  | Justin Ronald Newton         | Ryan B. Springer, D.O.       |
| Jody C. Leng, M.D.          | Montalbano, M.D.            | Ritesh Shailesh Patel, M.D.  | Rosenow, D.O.                | Marshall T. Stafford, M.D.   |
| Laebe Lester, M.D.          | Elilary Montilla            | Sephalie Yogesh Patel, M.D.  | John Patrick Rowlands, M.D.  | Christopher Lynn             |
| Yafen Liang, M.D.           | Medrano, M.D.               | Shital Dinesh Patel, M.D.    | Daniel D. Rubens, M.B., B.S. | Stalker, M.D.                |
| Gary Lichliter, M.D.        | Carlos Montoya, M.D.        | Josemaria Paterno, M.D.      | Alexander Rusanov, M.D.      | Sally Gowen Stander, M.D.    |
| Victor Cheng Lin, M.D.      | Christopher H.              | Leon Schwarz Perel, M.D.     | Frank Matthew Ryan, M.D.     | Andrea Zatlín Stark, M.D.    |
| Laura Kris Lindsay, D.O.    | Moore, M.D.                 | Paul Perring, M.D.           | James M. Ryan, M.D.          | Barry A. Steinkamp, M.D.     |
| Samuel Everett              | MicHael Moore, M.D.         | James Perrott, M.D.          | Sivosh Saatee, M.D.          | John Stenglein, M.D.         |
| Lindsey, M.D.               | Laura R. Morello, M.D.      | Luke S. Perry, M.D.          | Karl Saba, D.O.              | Kellie Jean Stivers, M.D.    |
| Justin Lipper, M.D.         | Isaac Cherrington           | April K. Peterson, M.D.      | Ashraf Sabahat, M.D.         | Corey James Stotts, M.D.     |
| Eric Lamont                 | Morris, M.D.                | Jackie P. Phan, M.D.         | Adam Jason Sachs, M.D.       | Thomas Emmett Street, M.D.   |
| Lipscomb, M.D.              | Regina Morris, M.D.         | Bradley Pillow, M.D.         | Daniel Saddawi-Konefka,      | Matthew Robert Suchy, D.O.   |
| Dmitriy Litvinenko, M.D.    | Christopher Moser, M.D.     | Gabriel Eduardo Pitta, M.D.  | M.D.                         | Joshua Suderman, M.D.        |
| Mark Robert                 | Ananth Mothukuri,           | Stephan G. Pizzola, M.D.     | Jill Sagonda-Guerrero, M.D.  | Edward I. Suh, M.D.          |
| Livingston, M.D.            | M.B., B.S.                  | Mark Poblete, M.D.           | Engy T. Said, M.D.           | Wendy Michelle Suhre, M.D.   |
| Joshua Jonathan             | Thomas Moyer, M.D.          | Jason Poirier, M.D.          | Tito C. Saldana, M.D.        | Andrew C. Sullivan, M.D.     |
| Livingstone, M.D.           | Daniel Patrick              | Marie Chantal Policard, M.D. | Ovidia Sam, D.O.             | Whitney Sullivan-Lewis,      |
| Jeffrey Kyle Longnion, M.D. | Mulcrone, M.D.              | Praveen Dharmapalan          | Amir Samir, M.D.             | M.D.                         |
| Marc Anthony Lotano, M.D.   | Daisy Munoz, M.D.           | Prasanna, M.B., B.S.         | Jacob Stephen Samson, M.D.   | Benjamin Joseph              |
| Rowell Sacamay Loyola, D.O. | Jonathan Lee Munro,         | David Preiss, M.D.           | Victoria L. San Juan, M.D.   | Sutlive, M.D.                |
| Kyaw Oo Lwin, M.B., B.S.    | M.B., B.S.                  | Larry Vincent Presley, M.D.  | Joseph Aaron Sanders, M.D.   | Katherine Winstead           |
| Sara L. Mackerley, D.O.     | Aungnainghtun               | Neal Puthumana, M.D.         | Madhupal K. Sandhu,          | Suttle, M.D.                 |
| Kiri Mackersey, M.D.        | Myasein, M.D.               | Nathan Putnam, M.D.          | M.B., B.S.                   | Maria del Pilar Suz, M.D.    |
| Praneeth Madabhushi,        | Harika Nagavelli, M.D.      | Tameka Jeannine Pyles, M.D.  | Sunny Sandhu, M.D.           | Jonathan Samuel              |
| M.B., B.S.                  | Erik J. Nagel, D.O.         | Tara Ahlberg Queener, M.D.   | Andrew Yefim Sapson, M.D.    | Swade, D.O.                  |
| Maxime Madhere, M.D.        | Ryan Joseph Nageotte, M.D.  | Nawal Ellen Ragheb-          | Stephen Albert Sardino,      | Jeffrey Robert               |
| Jaswanth Madisetty, M.D.    | Katherine Auringer          | Mueller, D.O.                | Jr., M.D.                    | Swanson, M.D.                |
| Soumya Mahapatra, M.D.      | Naidu, M.D.                 | Rupert Joseph Rajaratnam,    | Thomas Frank Sawyer, M.D.    | William Lane Swartz, M.D.    |
| Ryan Maher, M.D.            | Anil Govindan Nair, M.D.    | M.B., B.S.                   | Pascal Scemama de            | Dorota Monika                |
| Praveen Maheshwari, M.D.    | Khodadad Namirianian, M.D.  | Suresh Raman, M.D.           | Gialluly, M.D.               | Szczodry, M.D.               |
| Amresh Mahil, M.D.          | Sandeep Narayan, M.B., B.S. | Mihir Rane, M.D.             | Nerma Basic Scharr, M.D.     | Rafik Tadors, M.D.           |

## New Diplomates, American Board of Anesthesiology®, Fall 2014 (continued)

Jessica A. Tashjian, M.D.  
Byron D. Taylor, M.D.  
Heather Taylor, M.D.  
Norman E. Taylor,  
M.D., Ph.D.  
Eric George Teggatz, M.D.  
Charlotte Telford, M.D.  
Sarena N. Teng, M.D.  
Christopher Michael  
Terry, M.D.  
Terry Brandon Thacker, M.D.  
Shilen Pradip Thakrar, M.D.  
Adam Thaler, D.O.  
Dennis Andrew Thiel, M.D.  
James J. Thomas, M.D.  
Katherine Anne Thomas,  
M.D.  
Brian Wesley Thompson,  
M.D.  
Daniel Ryan Thrower, M.D.  
Sridhar Tirumala, M.D.  
Robert Toroussian, M.D.  
Kress Townley, M.D.  
Kim Tran, M.D.  
Levina Anh-Hong Tran, M.D.

My Linh Jennifer Tran, M.D.  
Tatyana Travkina, M.D.  
Mark A. Travnicek, M.D.  
Phat Tan Trinh, D.O.  
Agnieszka Trzcinka, M.D.  
Annie Ying-chieh Tsai, M.D.  
Victor Tubbesing, M.D.  
Merv Wayne Todd  
Unger, M.D.  
Obinna Nathan  
Uzodinma, M.D.  
Vinutha Voleti Vadde,  
M.B., B.S.  
Stephanie Marie  
Valenzuela, M.D.  
Michael Ray Van Dusen,  
D.O.  
Matthew David  
Vanderhoek, M.D.  
Suzanne L.  
Vanvalkenburgh, M.D.  
Narayana C.  
Varhabhatla, M.D.  
Michael David Velez, M.D.  
Milana Velikovich, D.O.

Maria Villacin, M.D.  
Silvia Villa-Royval, M.D.  
Navyugjit Virk, M.D.  
Victoria Vo, M.D.  
Martin Joseph Vogel, M.D.  
David Von Clef, M.D.  
Julie Tuyet Tran Vuong,  
M.D.  
Zinaida Wadhvani, M.D.  
Brant Michael Wagener,  
M.D., Ph.D.  
Andrew Walker, M.D.  
Glenn Lee Walker, M.D.  
Luke David Walker, M.D.  
Nolan D. Walther, M.D.  
James R. Walton, M.D.  
Tony Waskey, Jr., D.O.  
Dustin Watson, M.D.  
Derek Richard Weiland,  
M.D.  
Adam Matthew  
Weingart, M.D.  
Christian Monahan  
Welch, M.D.  
Taylor White, M.D.

Christopher Sung Wie,  
M.D.  
Jason Christopher  
Wigley, M.D.  
Armand Eugene  
Wilhelm, M.D.  
Tria K. Wilhite, M.D.  
Danielle Williams, M.D.  
James Anthony  
Williams, D.O.  
Lynell Williams, M.D.  
Thomas Joseph Willis, M.D.  
Earl Wilson, M.D.  
Casey Morgan  
Windrix, M.D.  
Anthony Winkowski, M.D.  
Francis Wolf, M.D.  
Eugene Wing-Tai Wong,  
M.D.  
Arthur Wood, M.D.  
Margaret Wu, M.D.  
Jacqueline Wunderlich,  
M.D.  
Zephyrinus Gabriel  
Wylie, D.O.

Lianjun Xu, M.D.  
Yuexian Grace Xu, M.D.  
Edward Hammond  
Yamoah, M.D.  
Edwin Kwame  
Yamoah, M.D.  
Hui Yang, M.D., Ph.D.  
Steven George  
Yannaras, M.D.  
Michael Anthony  
Yatsula, Jr., M.D.  
Aaron L. Young, M.D.  
Patrick Everett Young,  
M.D.  
Remone Yousif, M.D.  
Katherine Zaleski, M.D.  
Sonal Neeraj Zambare,  
M.B., B.S.  
Charles Floyd Zehm, M.D.  
Amber J. Zendner, M.D.  
Jonida Zeqo, M.D.  
Victoria Nan Zheng, M.D.  
John Mark  
Zimmerman, M.D.  
Suzana Maria Zorca, M.D.
